# Supplementary material for: Cystine-derived bis-naphthalimides as stimuli-responsive fluorescent gelators
Source: Royal Society of Chemistry journal article supplement (doi:10.1039/c4nj01755b), 2015-01-01
Supplement: c4nj01755b1.pdf [file c4nj01755b1.pdf]

Electronic Supplementary Information for

## Cystine-derived Bis-naphthalimides as Stimuli-Responsive Fluorescent Gelators

Rupam J. Sarma\*, Kakali Devi

Details of synthesis, characterization of the ligands **L1** and **L2** (Figures S1-S4 to S6-S9, copies of the  $^1\text{H}$  &  $^{13}\text{C}$  NMR spectra), ES-MS (Figure S5, S10), along with the relevant UV-vis, fluorescence, FT-IR and  $^1\text{H}$  NMR spectra (Figures S11-S24).

### 1. General experimental techniques.

All chemicals were commercially available from Sigma-Aldrich or Spectrochem (India) and used as received. Solvents for spectroscopic experiments were distilled under nitrogen atmosphere before use. All  $^1\text{H}$  and  $^{13}\text{C}$  NMR were measured on a 300 MHz Bruker spectrometer, and reported in  $\delta/\text{ppm}$ . The electronic absorption spectra were recorded on a Shimadzu UV-VIS spectrophotometer.

### 2. Copies of $^1\text{H}/^{13}\text{C}$ NMR spectra for ND1, ND2, L1 and L2.

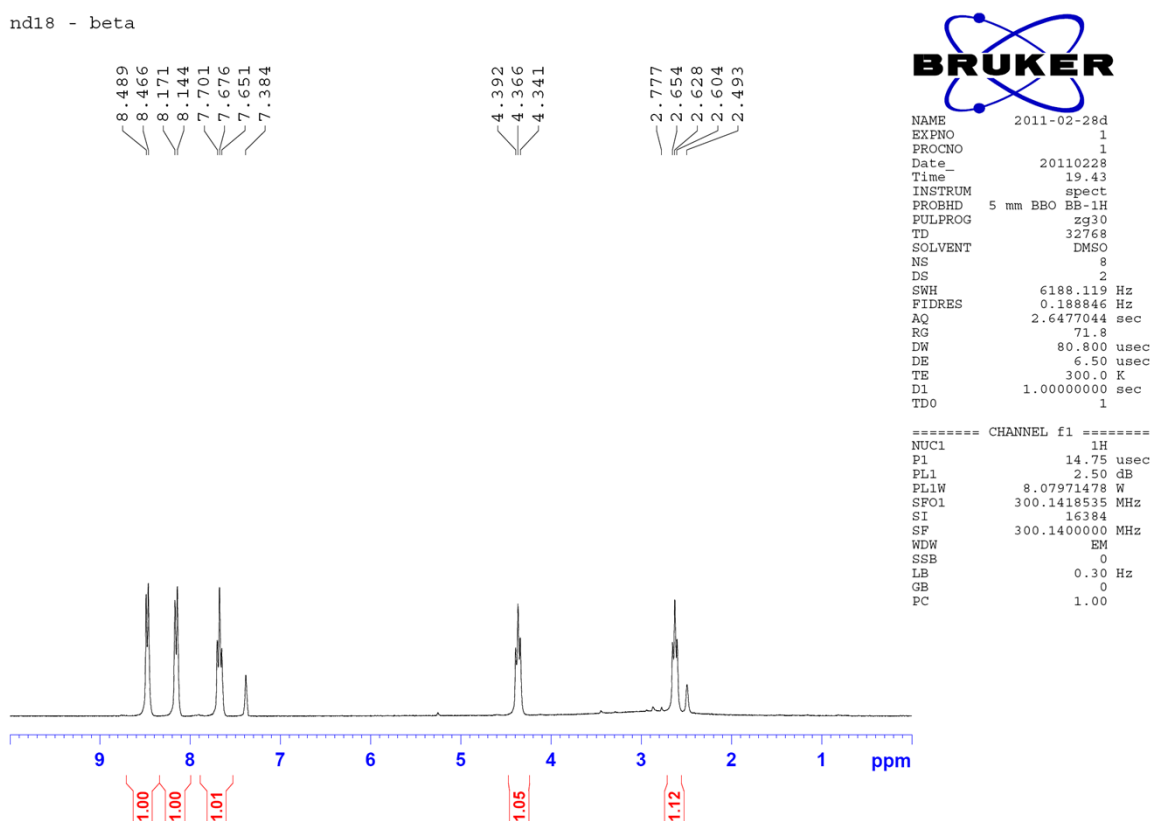

Figure S1:  $^1\text{H}$  spectra of **ND1** in  $\text{DMSO-d}_6/\text{CDCl}_3$

nd18-beta 13C

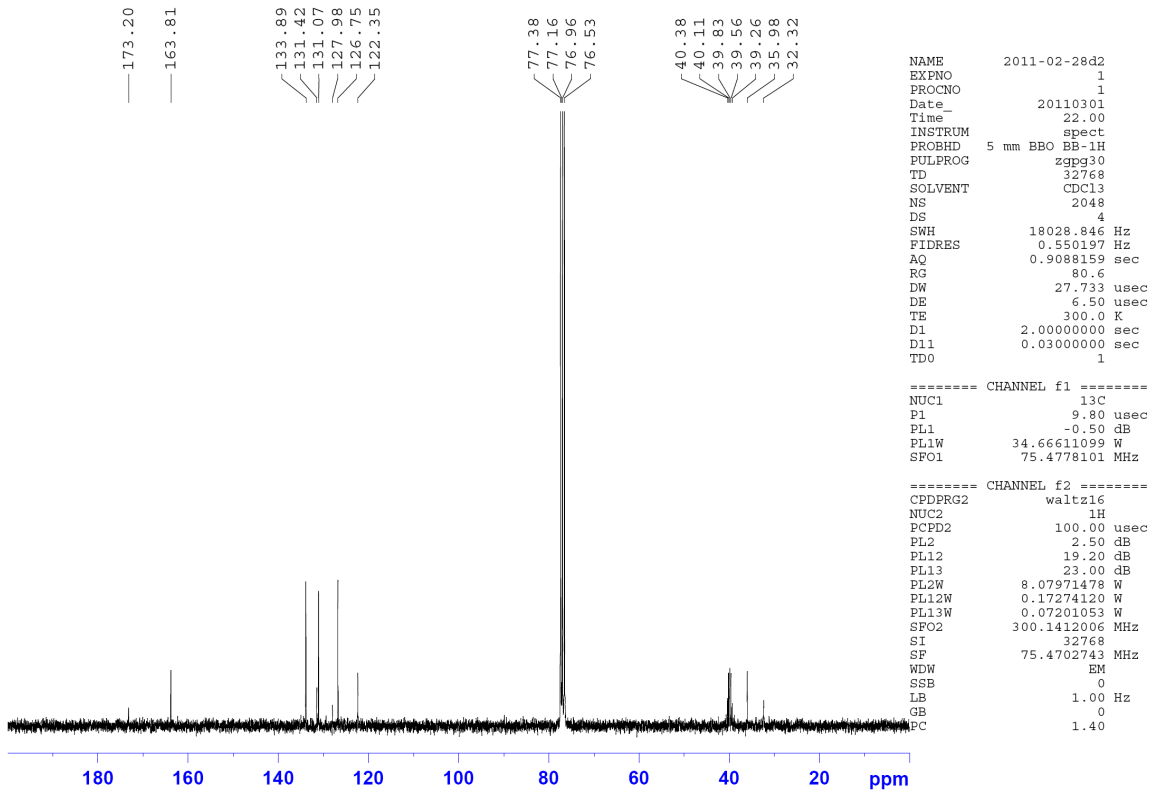

Figure S2:  $^{13}\text{C}$  NMR spectra of ND1 in DMSO- $d_6$ /CDCl $_3$

nd18B - CysOMe (# re)

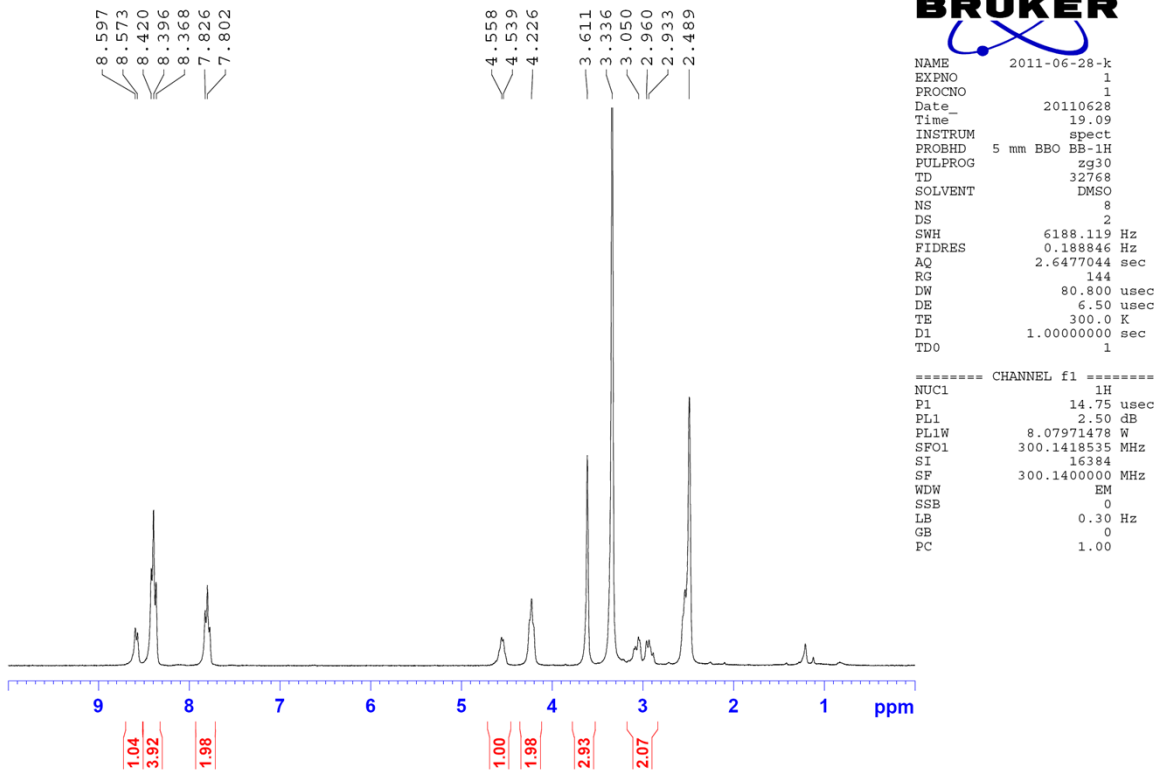

Figure S3:  $^1\text{H}$  NMR spectra of L1 in DMSO- $d_6$

nd18B - CysOMe (13C)

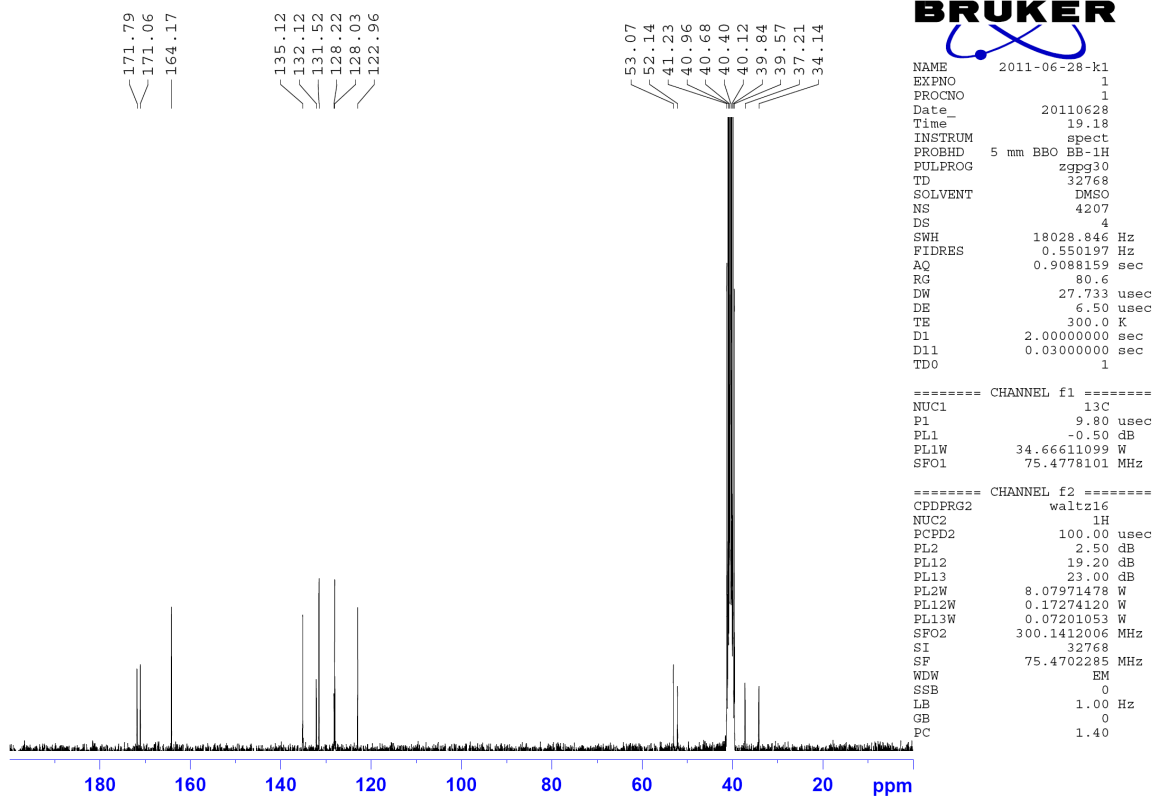

Figure S4:  $^{13}\text{C}$  NMR spectra of **L1** in  $\text{DMSO-d}_6$

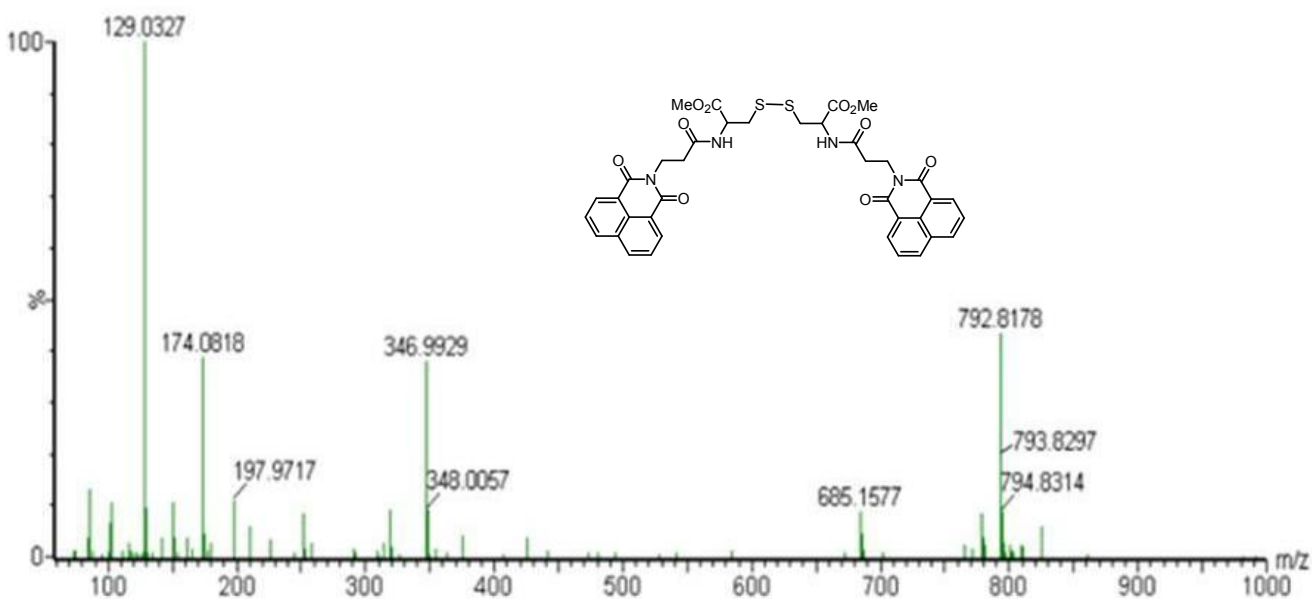

Figure S5: ES-MS of **L1** in MeCN ( $m/z = 793.81$ , calc. for  $\text{M}+\text{Na}^+$ )

nd18 - gaba 1H

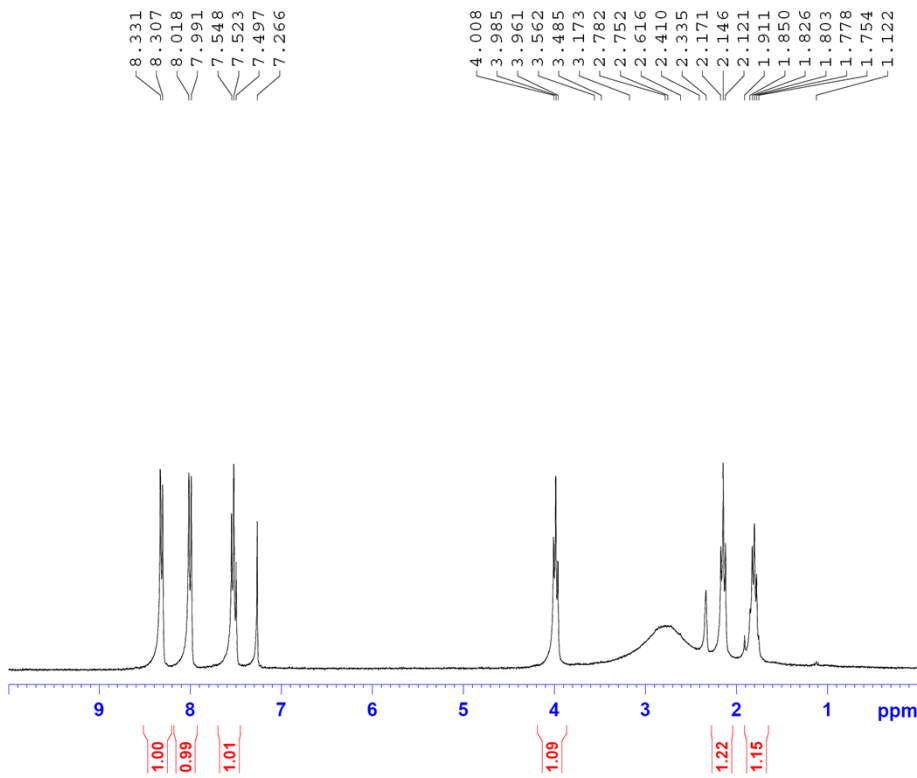

Figure S6: <sup>1</sup>H NMR spectra of ND2 in DMSO-d<sub>6</sub>/CDCl<sub>3</sub>

nd18 - gaba 13C

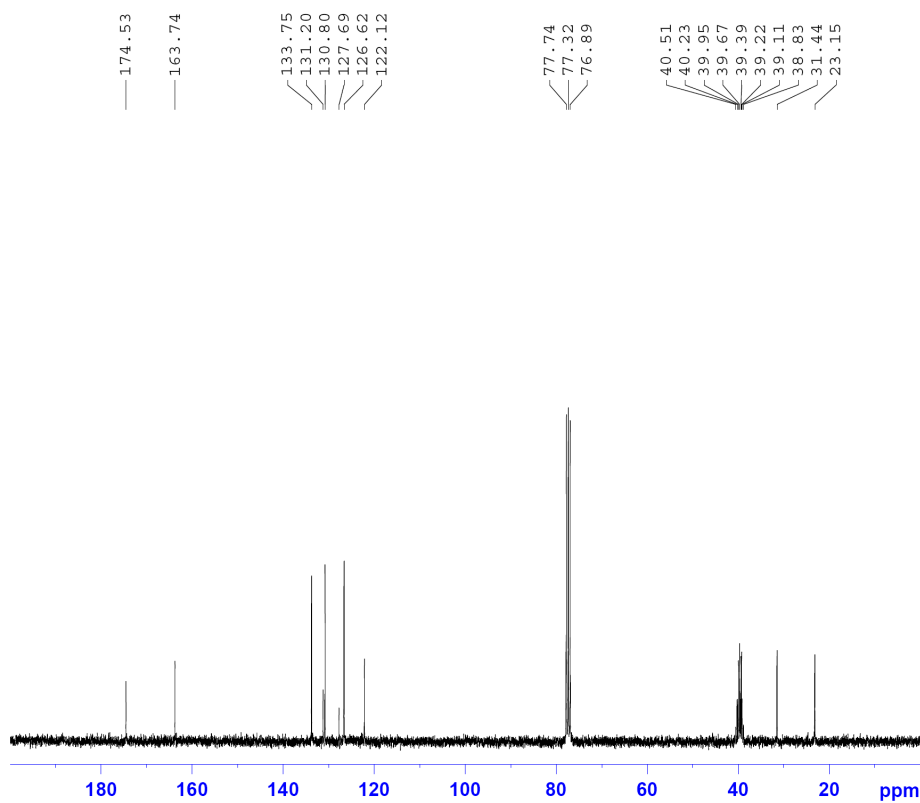

Figure S7: <sup>13</sup>C NMR spectra of ND2 in DMSO-d<sub>6</sub>/CDCl<sub>3</sub>

nd18G - CysOMe (# 1)

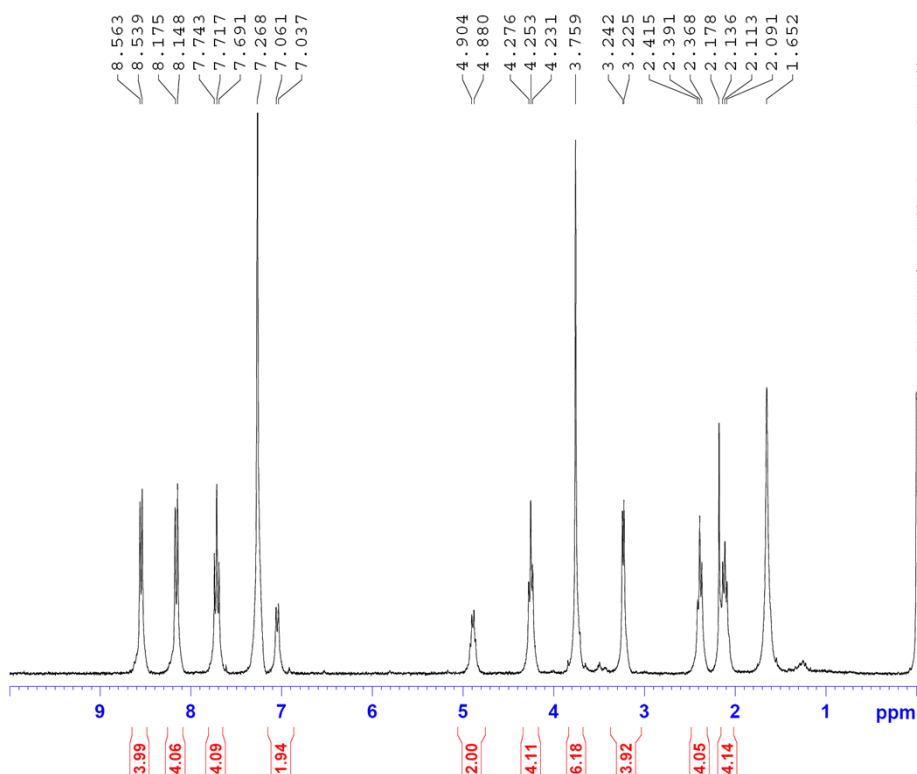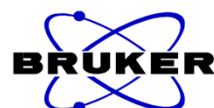

```

NAME      2011-06-24c
EXPNO     1
PROCNO    1
Date_     20110624
Time      18.32
INSTRUM   spect
PROBHD    5 mm BBO BB-1H
PULPROG   zg30
TD        32768
SOLVENT   CDCl3
NS        8
DS        2
SWH       6188.119 Hz
FIDRES    0.188846 Hz
AQ        2.6477044 sec
RG        80.6
DW        80.800 usec
DE        6.50 usec
TE        300.0 K
D1        1.00000000 sec
TD0       1
  
```

```

===== CHANNEL f1 =====
NUC1      1H
P1        14.75 usec
PL1       2.50 dB
PL1W      8.07971478 W
SFO1      300.1418535 MHz
SI        16384
SF        300.1400000 MHz
WDW       EM
SSB       0
LB        0.30 Hz
GB        0
PC        1.00
  
```

Figure S8:  $^1\text{H}$  NMR spectra of L2 in  $\text{CDCl}_3$

nd18G - CysOMe (# 13C)

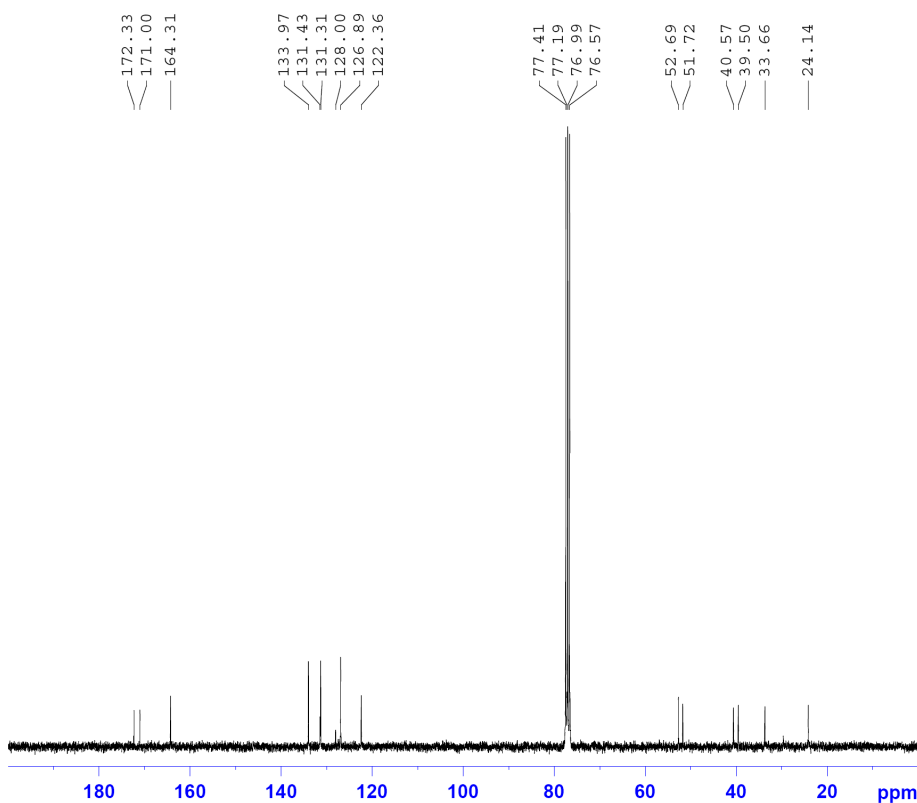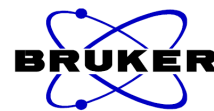

```

NAME      2011-06-27-e2
EXPNO     1
PROCNO    1
Date_     20110627
Time      17.16
INSTRUM   spect
PROBHD    5 mm BBO BB-1H
PULPROG   zgpg30
TD        32768
SOLVENT   CDCl3
NS        2002
DS        4
SWH       18028.846 Hz
FIDRES    0.550197 Hz
AQ        0.9088159 sec
RG        80.6
DW        27.733 usec
DE        6.50 usec
TE        300.0 K
D1        2.00000000 sec
D11       0.03000000 sec
TD0       1
  
```

```

===== CHANNEL f1 =====
NUC1      13C
P1        9.80 usec
PL1       -0.50 dB
PL1W      34.66611099 W
SFO1      75.4778101 MHz

===== CHANNEL f2 =====
CDPRG2    waltz16
NUC2      1H
PCPD2     100.00 usec
PL2       2.50 dB
PL12      19.20 dB
PL13      23.00 dB
PL2W      8.07971478 W
PL12W     0.17274120 W
PL13W     0.07201053 W
SFO2      300.1432006 MHz
SI        32768
SF        75.4702658 MHz
WDW       EM
SSB       0
LB        1.00 Hz
GB        0
PC        1.40
  
```

Figure S9:  $^{13}\text{C}$  NMR spectra of L2 in  $\text{CDCl}_3$

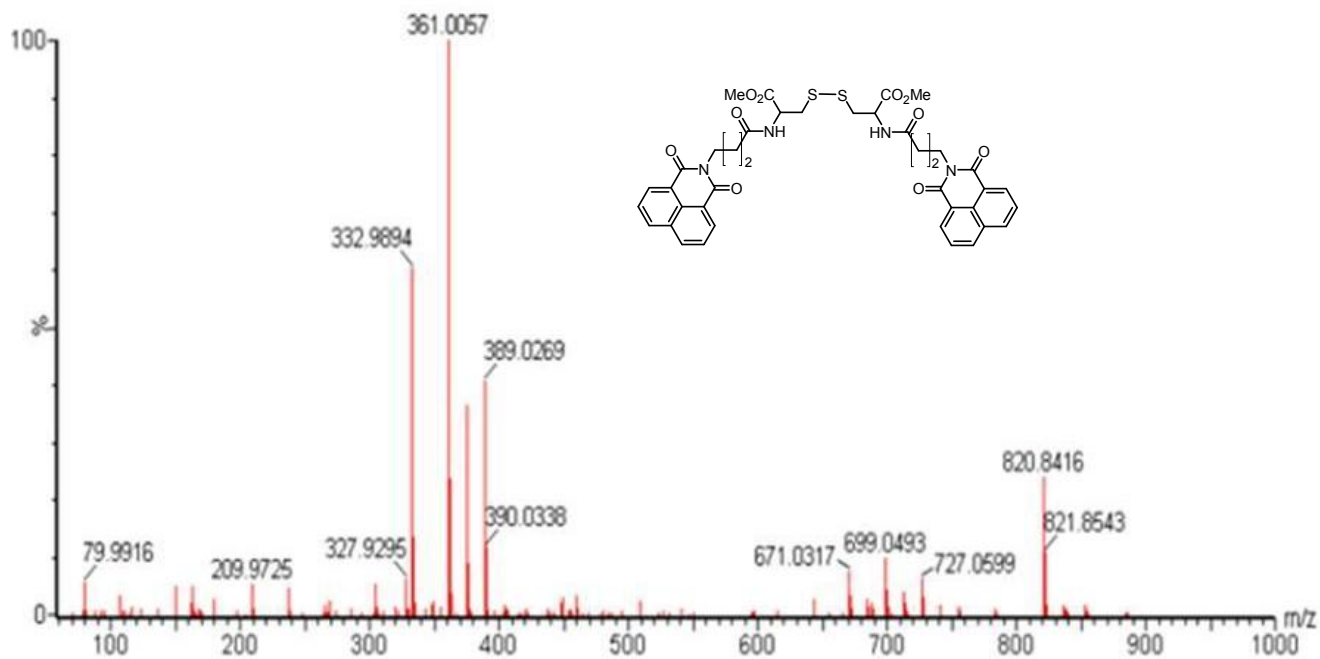

**Figure S10:** ES-MS of L2 ( $m/z = 821.85$ , calc. for  $M+Na^+$ )

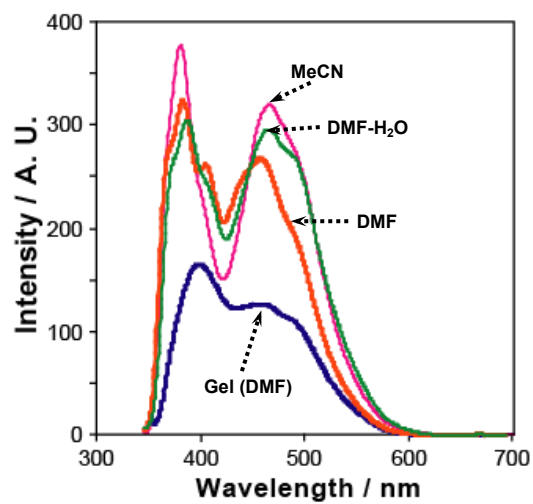

**Figure S11:** Solvent-dependent fluorescence emission spectra of L2 ( $\lambda_{ex}$  340nm).

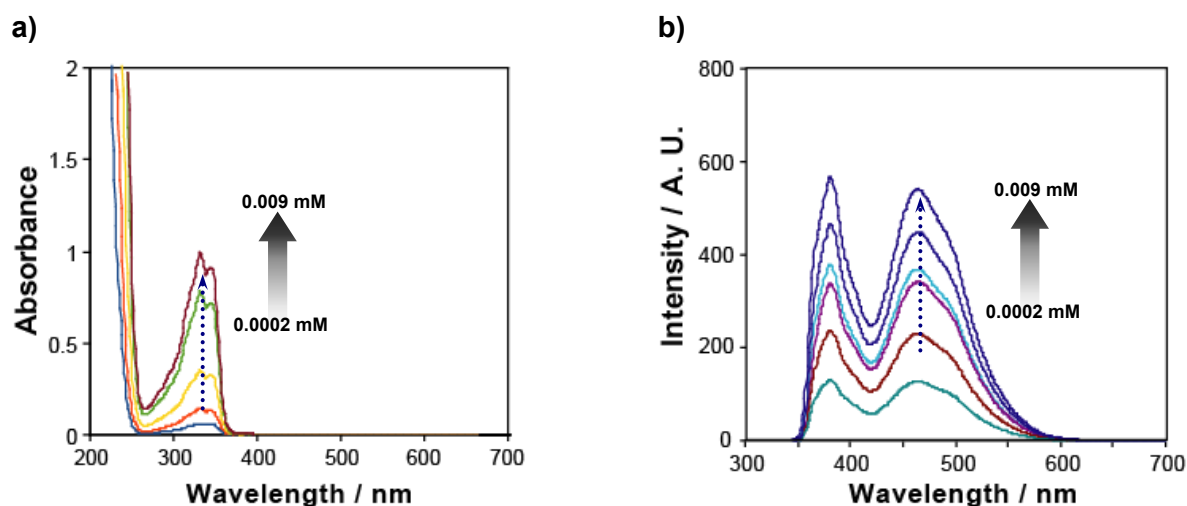

**Figure S12:** Concentration-dependent spectra of **L2** (in MeCN): (a) UV-visible, and (b) fluorescence emission ( $\lambda_{\text{ex}}$  340nm); Note the monomer/excimer emission for **L2**.

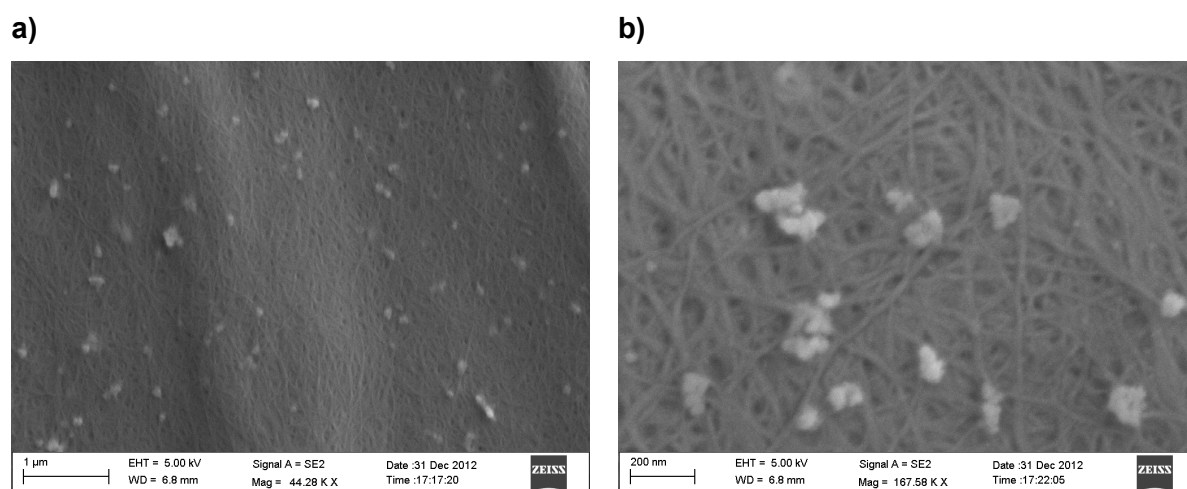

**Figure S13.** (a), (b) SEM images of the dried organogel obtained from **L1** in DMF (5mg/mL; the particles were initially formed due to spontaneous aggregation of the **L1** gelator (as tiny nucleation sites) while the formation of fibres was relatively slow (ageing 2-3 days).

Such features were not observed for **L2** in DMF, except at high concentration (>12mg/mL). It appears that the gelation of acetonitrile and DMF by **L1** and **L2** occurs due to hydrogen bonding between the amide NH groups and the solvent (immobilisation of the solvent molecules), with concomitant hydrophobic packing (stacking interactions) of the bis-naphthalimide motifs, which result in the formation of networks of self-assembled fibres.

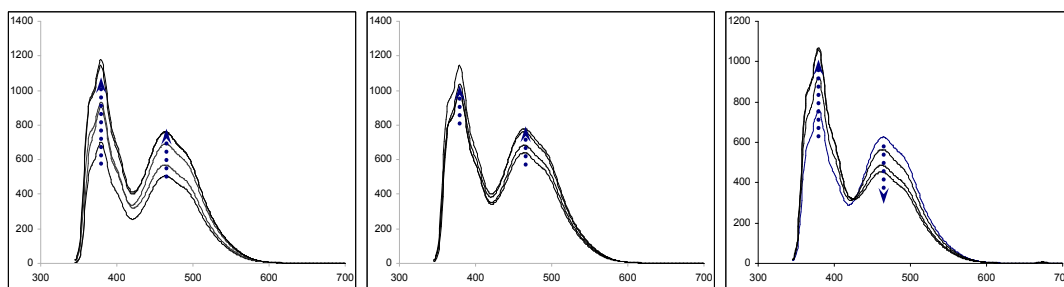

**Figure S14.** Fluorescence titration of **L1** with chloride, bromide and acetate anions in acetonitrile (10% water).

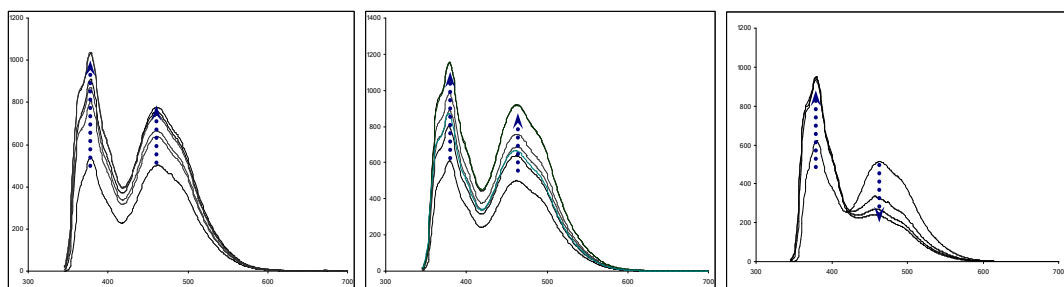

**Figure S15.** Fluorescence titration of **L2** with chloride, bromide and acetate anions in acetonitrile (10% water).



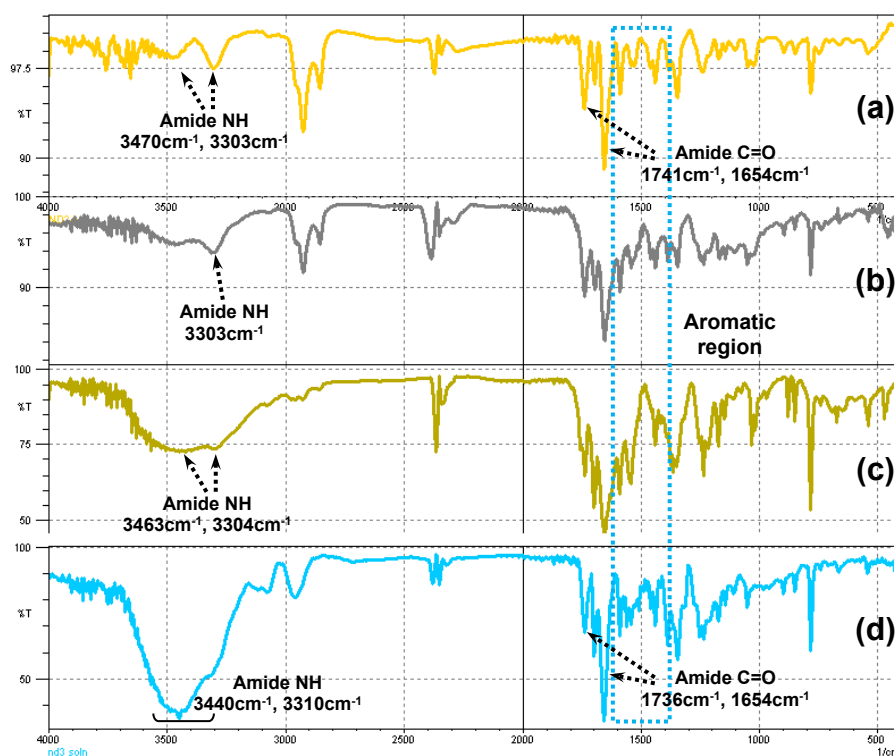

**Figure S16.** Comparative study of FT-IR spectra of **L2** under various conditions: (a) 0.1mg/mL in chloroform; (b) 1.0mg/mL in chloroform; (c) dried **L2**/acetonitrile gel, after removal of solvent; (d) **L2**/acetonitrile gel, when suspended in chloroform; the absorptions at  $3303\text{cm}^{-1}$  in dilute solutions and in the aromatic region were distinct, of which the latter was apparently affected by changes in gelator concentration.

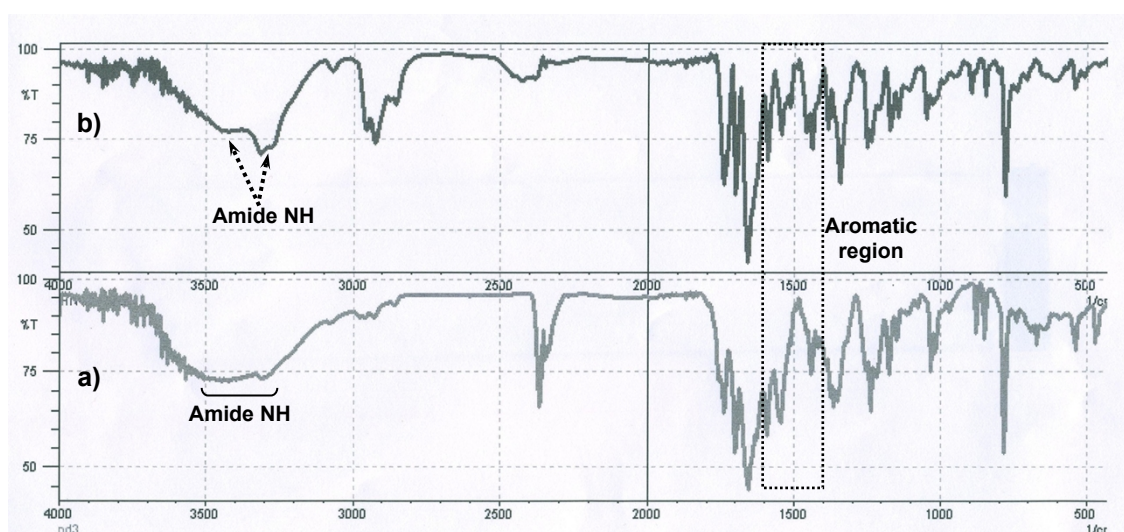

**Figure S17.** FTIR spectra of (a) **L2**/acetonitrile gel, and (b) upon addition of  $\text{BF}_4^-$  anions (**L2**/ $\text{NaBF}_4$ ). Changes in the amide NH absorption and the aromatic region are noteworthy.

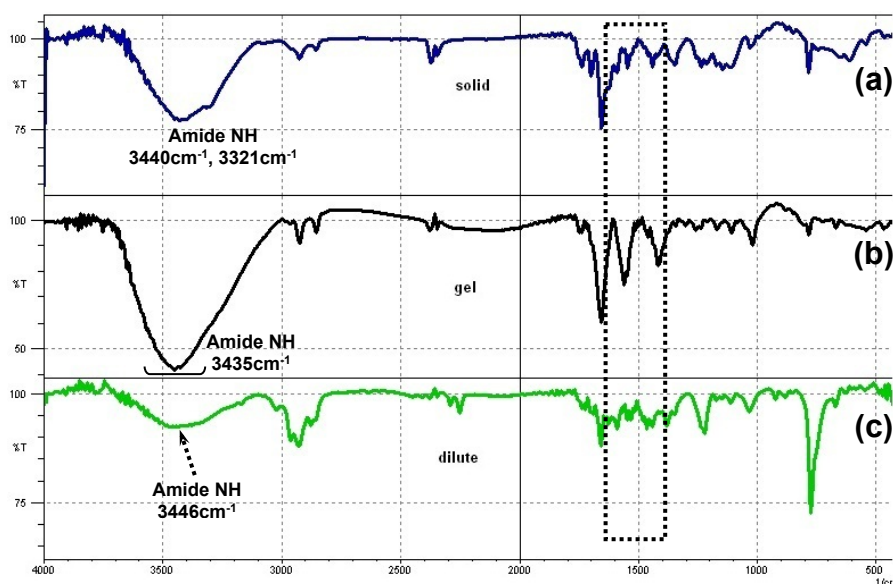

**Figure S18.** Comparative study of FT-IR spectra of **L1** under various conditions: (a) **L1**/DMF gel after removal of solvent; (b) **L1**/DMF, when suspended in chloroform ; (c) **L1** when suspended in acetonitrile; the absorptions at  $3446\text{ cm}^{-1}$  in dilute solutions was affected by changes in gelator concentration.

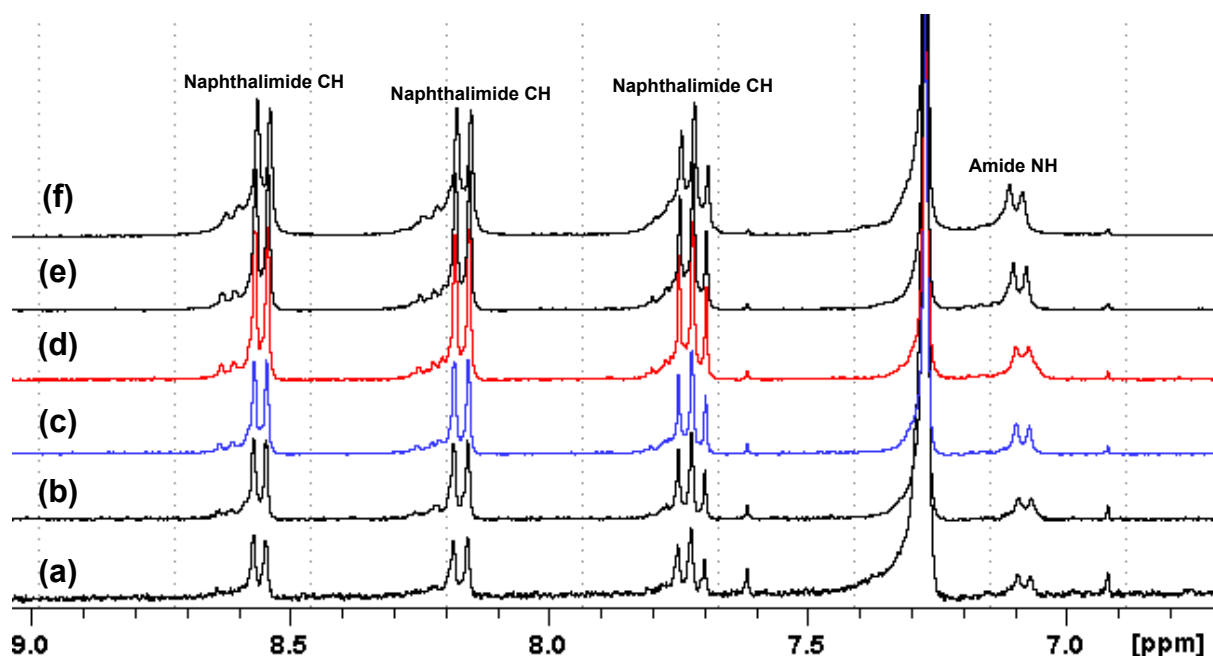

**Figure S19.** Concentration dependent  $^1\text{H}$  NMR spectra of **L2** in  $\text{CDCl}_3$ : (a)  $0.3\text{ mg/mL}$ ; (b)  $1.0\text{ mg/mL}$ ; (c)  $2.0\text{ mg/mL}$ ; (d)  $4.0\text{ mg/mL}$ ; (e)  $6.0\text{ mg/mL}$ , with formation of partial gel; and (f) after the gelation process is complete. The amide NH resonance at  $7.078\text{ ppm}$  in dilute solutions, i.e.  $[\text{L2}] < 2\text{ mg/mL}$  remains relatively unaffected by changes in gelator concentration. Beyond the critical gelation concentration of  $6\text{ mg/mL}$ , the amide NH resonances shifted downfield, to  $7.082\text{ ppm}$ , such that  $\Delta\delta = 0.018\text{ ppm}$ , indicating that H-bonding interactions were not dominant. However, the onset of gelation did cause the naphthalimide CH resonances to shift upfield by  $\sim 0.01\text{ ppm}$ ; for instance, from  $7.723$  (i.e. spectra 'a') to  $7.714\text{ ppm}$  (i.e. spectra 'f'), and from  $8.17\text{ ppm}$  to  $8.16\text{ ppm}$ .

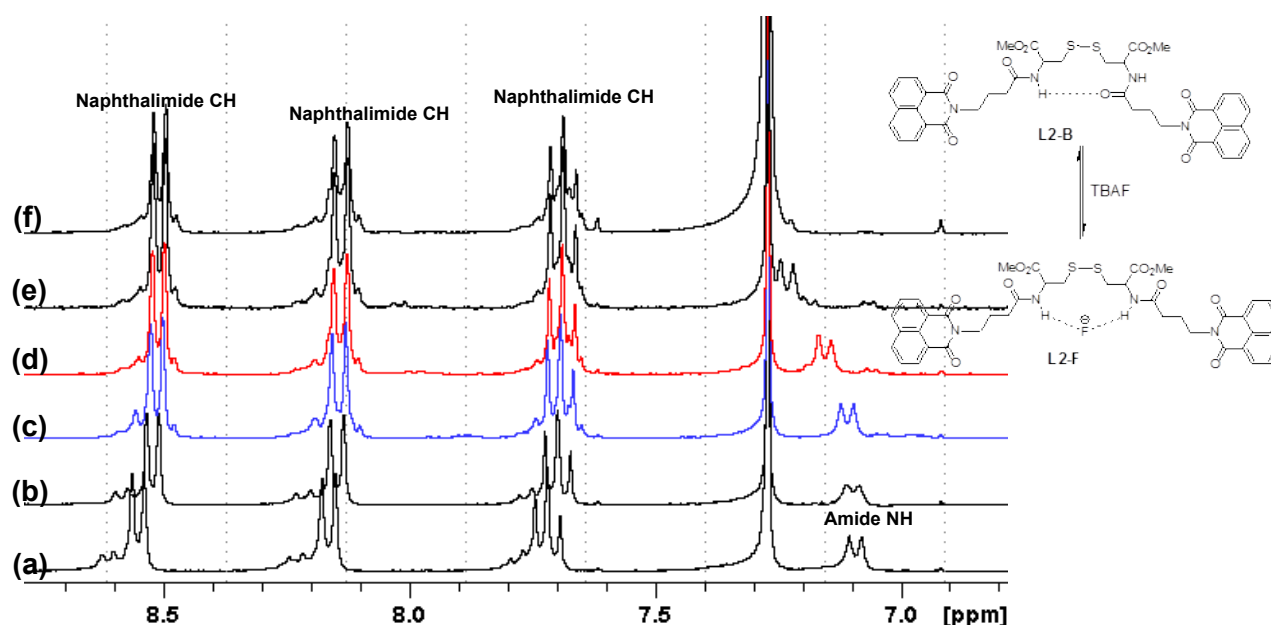

**Figure S20.** Partial  $^1\text{H}$  NMR spectra showing the effect of TBAF on **L2** (3.0 mg in 0.5mL chloroform-d), during the gel-to-sol transformation; (a) Partially formed **L2**/chloroform gel; (b) **L2**/chloroform gel; (c)-(f), after TBAF addition (0.5, 1.0, 2.0 and 3.0 equiv); (Inset: Plausible hydrogen bonding interactions of **L2** with fluoride anions, i.e. TBAF, in chloroform-d)

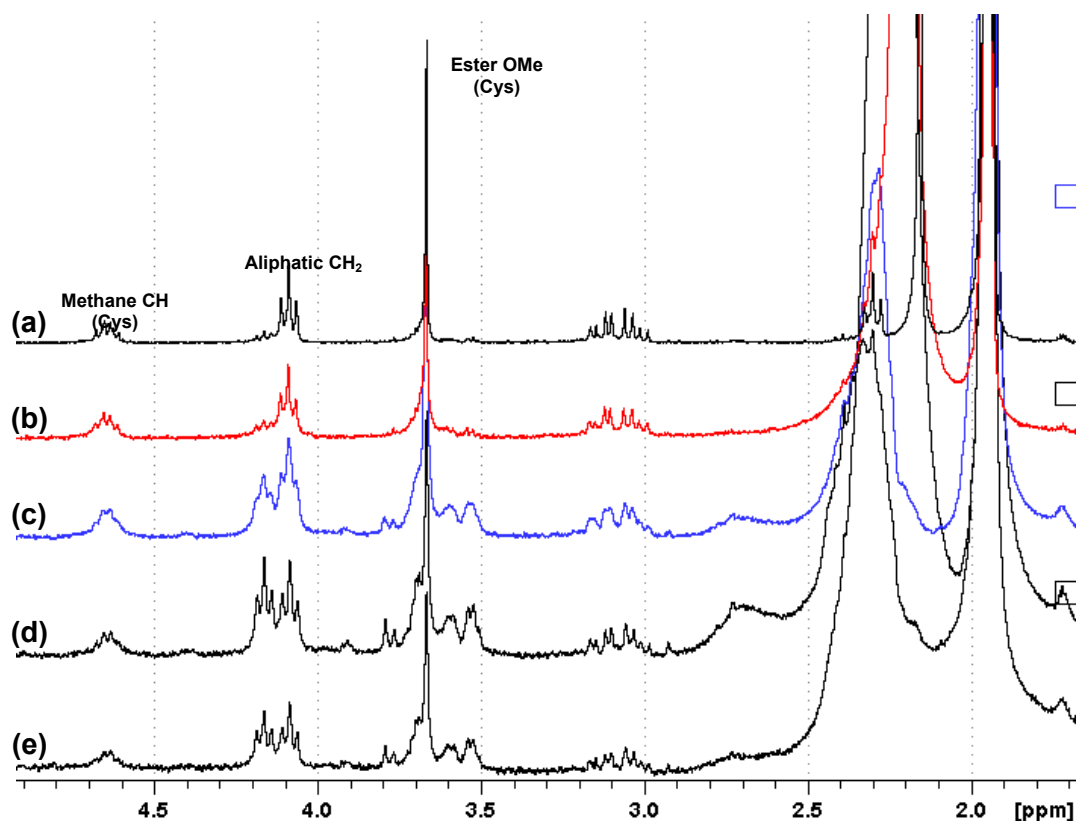

**Figure S21.** Partial  $^1\text{H}$  NMR spectra of **L2** showing the temperature-dependent variations of the naphthalimide CH and amide NH resonances in acetonitrile- $\text{d}_3$ : (a) 50°C; (b) 45°C; (c) 35°C; (d) 25°C; (e) 25°C after 12h. Splitting/broadening of the resonance due to the ester group (Cys) also indicated multiple interactions of this residue during the gel forming process.

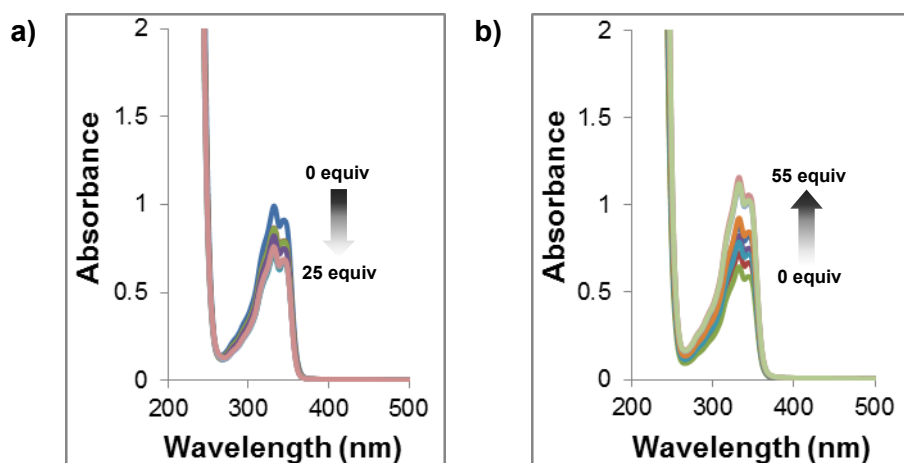

**Figure S22.** UV-vis spectra of **L2** in acetonitrile: (a) following the addition of fluoride anions (as TBAF, upto – equiv.); (b) and the addition of NaBF<sub>4</sub> (upto – equiv.); [**L2**] = 0.001mM

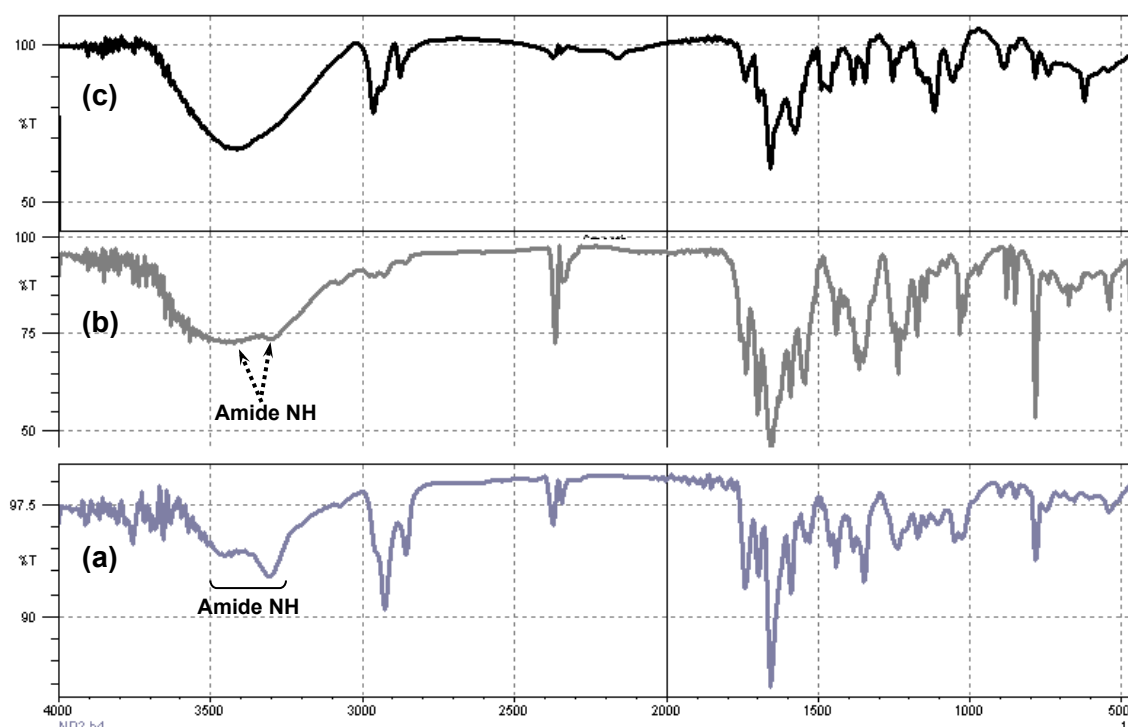

**Figure S23.** FTIR spectra of (a) **L2** (1.0mg/mL in chloroform); (b) **L2**/acetonitrile gel, after removal of solvent, and (c) upon addition of fluoride anions (as TBAF, ~ 20uL of 1mM stock); Changes in the amide NH absorption at 3304cm<sup>-1</sup> and the aromatic region are noteworthy.

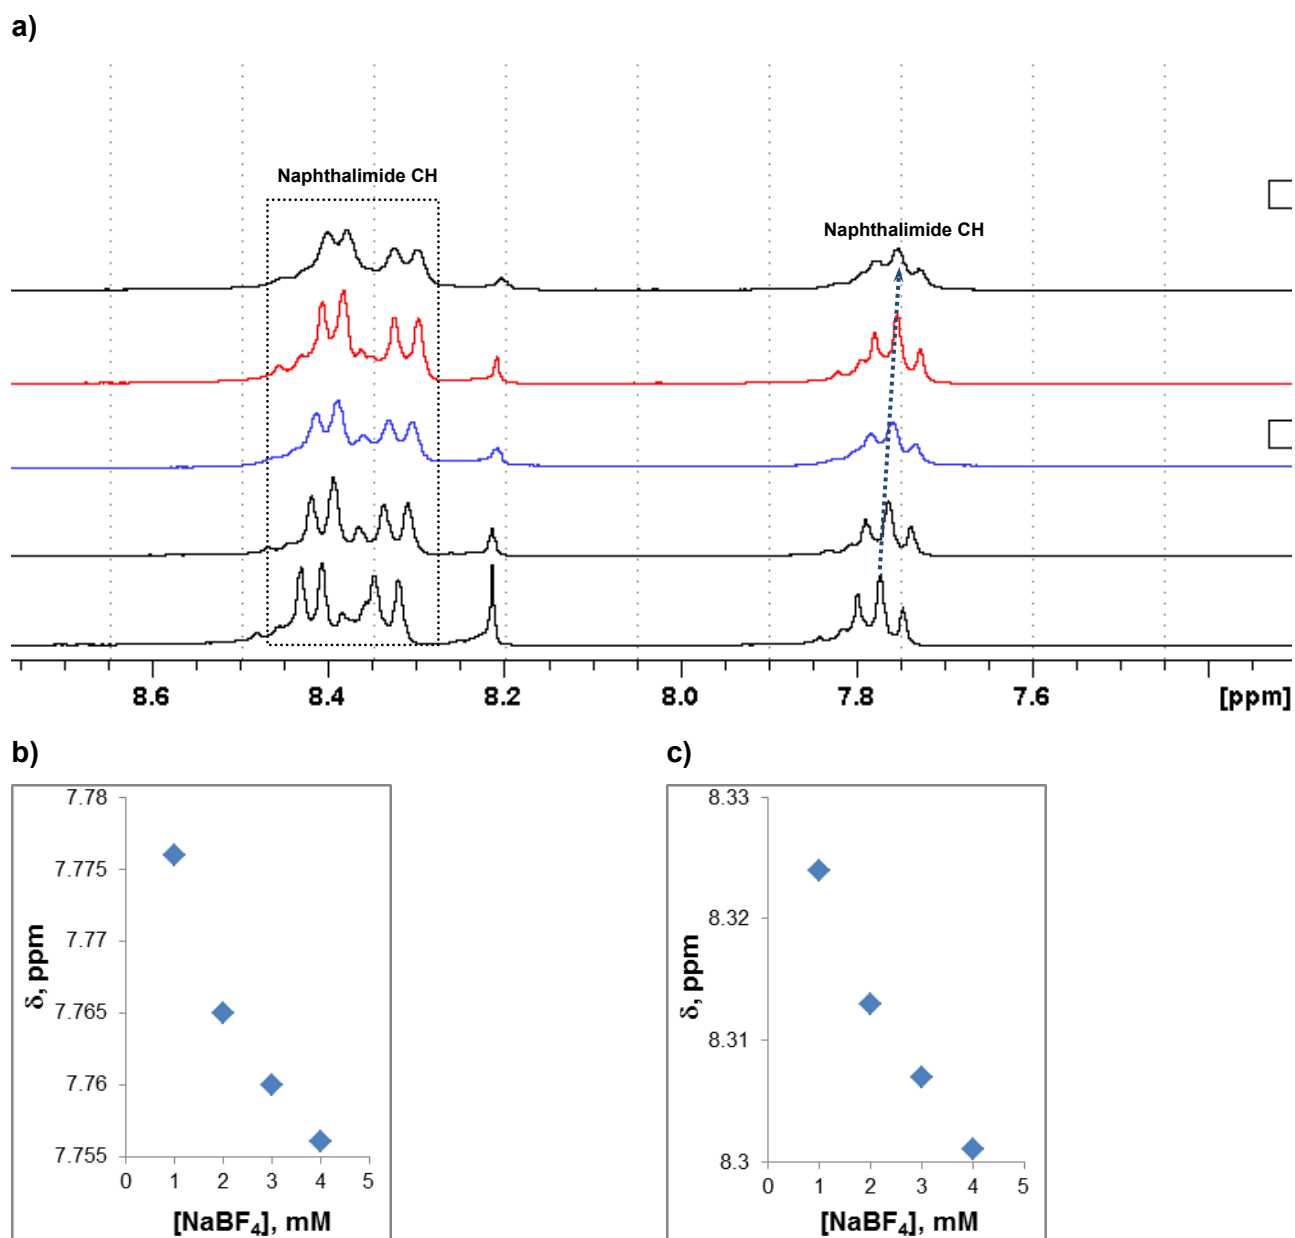

**Figure S24.** (a) Partial  $^1\text{H}$  NMR spectra of **L2** (3mg in  $\text{DMSO-d}_6$ ) following addition of  $\text{BF}_4^-$  anions (as  $\text{NaBF}_4$ ). (b), (c) The chemical-shift changes for the naphthalimide CH resonances were noteworthy, which were indicative of anion- $\pi$  interactions between the  $\text{BF}_4^-$  anions and the naphthalimide motif.
